# Supplementary material for: A new species of Psychrophrynella (Amphibia, Anura, Craugastoridae) from the humid montane forests of Cusco, eastern slopes of the Peruvian Andes
Source: PeerJ. 2016 Mar 14;4:e1807. doi: 10.7717/peerj.1807 (PMC4793343; doi:10.7717/peerj.1807)
Supplement: Data S1 [file peerj-04-1807-s002.xlsx]

## Sheet: catalogue & chytrid data
Q	FieldSeries	Museum	Reference	Type	Bd C(t)	Bd GE	Bd ZEswab	log(ZE)	Bd PCR	Species	Sex	Date	Time	Elevation	Country	Region	Province	Locality	Site	Northing	Easting	IMAGE
603.15	86.15	CORBIDI	16504	Paratype	Undetermined	0	0	0	Plate 71	Psychrophrynella sp. Japumayo	female	2015-06-18	13:30:00	3137	Peru	Cusco	Paucartambo	ACP Ukumari Llakta	Tambo Japumayo	-13.45	-71.0365	ALE251-281
604.15	99.15	MHNC	14656	Paratype	Undetermined	0	0	0	Plate 71	Psychrophrynella sp. Japumayo	male	2015-06-18	13:25:00	3140	Peru	Cusco	Paucartambo	ACP Ukumari Llakta	Tambo Japumayo	-13.45	-71.0365	ALE302-311
605.15	88.15	MHNC	14670	Paratype	Undetermined	0	0	0	Plate 71	Psychrophrynella sp. Japumayo	male	2015-06-18	13:25:00	3140	Peru	Cusco	Paucartambo	ACP Ukumari Llakta	Tambo Japumayo	-13.45	-71.0365	ALE391-395
606.15	100.15	CORBIDI	16505	Paratype	Undetermined	0	0	0	Plate 71	Psychrophrynella sp. Japumayo	male	2015-06-18	13:40:00	3140	Peru	Cusco	Paucartambo	ACP Ukumari Llakta	Tambo Japumayo	-13.4501	-71.0365	ALE320-329
608.15	87.15	CORBIDI	16506	Paratype	Undetermined	0	0	0	Plate 71	Psychrophrynella sp. Japumayo	male	2015-06-18	14:05:00	3165	Peru	Cusco	Paucartambo	ACP Ukumari Llakta	Tambo Japumayo	-13.4505	-71.0381	ALE282-292
609.15	89.15	CORBIDI	16992	Paratype	Undetermined	0	0	0	Plate 71	Psychrophrynella sp. Japumayo	male	2015-06-18	14:07:00	3165	Peru	Cusco	Paucartambo	ACP Ukumari Llakta	Tambo Japumayo	-13.4506	-71.0382	ALE403-405
610.15	90.15	MHNC	14671	Paratype	Undetermined	0	0	0	Plate 71	Psychrophrynella sp. Japumayo	male	2015-06-18	14:50:00	3143	Peru	Cusco	Paucartambo	ACP Ukumari Llakta	Tambo Japumayo	-13.4497	-71.0356	ALE406-409
613.15	91.15	MHNC	14672	Paratype	Undetermined	0	0	0	Plate 71	Psychrophrynella sp. Japumayo	male	2015-06-18	15:35:00	3158	Peru	Cusco	Paucartambo	ACP Ukumari Llakta	Tambo Japumayo	-13.4501	-71.0314	ALE396-398
614.15	92.15	CORBIDI	16993	Paratype	Undetermined	0	0	0	Plate 71	Psychrophrynella sp. Japumayo	male	2015-06-18	15:43:00	3143	Peru	Cusco	Paucartambo	ACP Ukumari Llakta	Tambo Japumayo	-13.4503	-71.0308	ALE293-301
615.15	93.15	CORBIDI	16994	Paratype	Undetermined	0	0	0	Plate 71	Psychrophrynella sp. Japumayo	male	2015-06-18	15:54:00	3136	Peru	Cusco	Paucartambo	ACP Ukumari Llakta	Tambo Japumayo	-13.4502	-71.0291	ALE399-402
627.15	111.15	CORBIDI	16503	Paratype	Undetermined	0	0	0	Plate 71	Psychrophrynella sp. Japumayo	male	2015-06-20	12:30:00	2777	Peru	Cusco	Paucartambo	ACP Ukumari Llakta	Playa Japumayo	-13.4483	-71.0107	ALE859-868
628.15	110.15	MHNC	14668	Paratype	Undetermined	0	0	0	Plate 71	Psychrophrynella sp. Japumayo	female	2015-06-20	12:40:00	2778	Peru	Cusco	Paucartambo	ACP Ukumari Llakta	Playa Japumayo	-13.4483	-71.0107	ALE967-976
629.15	102.15	CORBIDI	16501	Paratype	Undetermined	0	0	0	Plate 71	Psychrophrynella sp. Japumayo	female	2015-06-20	12:45:00	2780	Peru	Cusco	Paucartambo	ACP Ukumari Llakta	Playa Japumayo	-13.4482	-71.0107	ALE647-649
631.15	118.15	MHNC	14669	Paratype	Undetermined	0	0	0	Plate 71	Psychrophrynella sp. Japumayo	female	2015-06-20	13:30:00	2798	Peru	Cusco	Paucartambo	ACP Ukumari Llakta	Playa Japumayo	-13.4486	-71.0114	ALE977-990
633.15	104.15	MHNC	14667	Paratype	Undetermined	0	0	0	Plate 71	Psychrophrynella sp. Japumayo	male	2015-06-20	14:25:00	2787	Peru	Cusco	Paucartambo	ACP Ukumari Llakta	Playa Japumayo	-13.4481	-71.0105	ALE1002-1012
634.15					Undetermined	0	0	0	Plate 71	Psychrophrynella sp. Japumayo	male	2015-06-20	14:30:00	2787	Peru	Cusco	Paucartambo	ACP Ukumari Llakta	Playa Japumayo	-13.4481	-71.0105	ALE546-47
635.15	105.15	CORBIDI	16502	Paratype	Undetermined	0	0	0	Plate 71	Psychrophrynella sp. Japumayo	female	2015-06-20	14:50:00	2795	Peru	Cusco	Paucartambo	ACP Ukumari Llakta	Playa Japumayo	-13.4466	-71.0776	ALE991-1001
636.15					Undetermined	0	0	0	Plate 71	Psychrophrynella sp. Japumayo	male	2015-06-21	11:00:00	2670	Peru	Cusco	Paucartambo	ACP Ukumari Llakta	Derrumbe 2650 m	-13.445	-71.0036	ALE548-49
637.15	121.15	CORBIDI	16496	Paratype	Undetermined	0	0	0	Plate 71	Psychrophrynella sp. Japumayo	male	2015-06-21	11:05:00	2672	Peru	Cusco	Paucartambo	ACP Ukumari Llakta	Derrumbe 2650 m	-13.445	-71.0036	ALE869-876
638.15	106.15	MHNC	14662	Paratype	Undetermined	0	0	0	Plate 71	Psychrophrynella sp. Japumayo	female	2015-06-21	11:07:00	2710	Peru	Cusco	Paucartambo	ACP Ukumari Llakta	Derrumbe 2650 m	-13.4451	-71.0037	ALE1013-1021
639.15					Undetermined	0	0	0	Plate 71	Psychrophrynella sp. Japumayo	male	2015-06-21	11:07:00	2710	Peru	Cusco	Paucartambo	ACP Ukumari Llakta	Derrumbe 2650 m	-13.4451	-71.0037	ALE550-51
640.15					Undetermined	0	0	0	Plate 71	Psychrophrynella sp. Japumayo	male	2015-06-21	11:10:00	2710	Peru	Cusco	Paucartambo	ACP Ukumari Llakta	Derrumbe 2650 m	-13.4452	-71.0037	ALE552-53
1001.15	107.15	MHNC	14658	Paratype	Undetermined	0	0	0	Plate 76	Psychrophrynella sp. Japumayo	male	2015-06-21	11:56:00	2749	Peru	Cusco	Paucartambo	ACP Ukumari Llakta	Derrumbe Japumayo	-13.4459	-71.0035	ALE877-885
1002.15	119.15	CORBIDI	16498	Paratype	Undetermined	0	0	0	Plate 76	Psychrophrynella sp. Japumayo	female	2015-06-21	12:00:00	2762	Peru	Cusco	Paucartambo	ACP Ukumari Llakta	Derrumbe Japumayo	-13.4458	-71.0036	ALE929-966
1003.15	120.15	CORBIDI	16497	Paratype	Undetermined	0	0	0	Plate 76	Psychrophrynella sp. Japumayo	male	2015-06-21	12:06:00	2763	Peru	Cusco	Paucartambo	ACP Ukumari Llakta	Derrumbe Japumayo	-13.4458	-71.0034	ALE890-906
1004.15					Undetermined	0	0	0	Plate 76	Psychrophrynella sp. Japumayo	male	2015-06-21	12:15:00	2752	Peru	Cusco	Paucartambo	ACP Ukumari Llakta	Derrumbe Japumayo	-13.4459	-71.0035	ALE570-72
1005.15					Undetermined	0	0	0	Plate 76	Psychrophrynella sp. Japumayo	male	2015-06-21	12:22:00	2752	Peru	Cusco	Paucartambo	ACP Ukumari Llakta	Derrumbe Japumayo	-13.4459	-71.0035	ALE566-67
1006.15					Undetermined	0	0	0	Plate 76	Psychrophrynella sp. Japumayo	juv	2015-06-21	13:30:00	2728	Peru	Cusco	Paucartambo	ACP Ukumari Llakta	Derrumbe Japumayo	-13.4458	-71.0038	ALE568-69
1007.15					Undetermined	0	0	0	Plate 76	Psychrophrynella sp. Japumayo	juv	2015-06-21	13:40:00	2728	Peru	Cusco	Paucartambo	ACP Ukumari Llakta	Derrumbe Japumayo	-13.4458	-71.0038
1008.15	127.15	CORBIDI	16495	Holotype	Undetermined	0	0	0	Plate 76	Psychrophrynella sp. Japumayo	male	2015-06-21	13:44:00	2728	Peru	Cusco	Paucartambo	ACP Ukumari Llakta	Derrumbe Japumayo	-13.4458	-71.0038	ALE650-672
1009.15	128.15	MHNC	14661	Paratype	Undetermined	0	0	0	Plate 76	Psychrophrynella sp. Japumayo	female	2015-06-21	14:33:00	2732	Peru	Cusco	Paucartambo	ACP Ukumari Llakta	Derrumbe Japumayo	-13.4462	-71.0037	ALE673-688
1010.15					Undetermined	0	0	0	Plate 76	Psychrophrynella sp. Japumayo	female	2015-06-22	09:35:00	2808	Peru	Cusco	Paucartambo	ACP Ukumari Llakta	chacra campamento Japumayo	-13.4487	-71.0118	ALE530-31
1011.15					Undetermined	0	0	0	Plate 76	Psychrophrynella sp. Japumayo	male	2015-06-22	09:55:00	2808	Peru	Cusco	Paucartambo	ACP Ukumari Llakta	chacra campamento Japumayo	-13.4487	-71.0118	ALE532-33
1015.15					Undetermined	0	0	0	Plate 76	Psychrophrynella sp. Japumayo	male	2015-06-21	20:10:00	2808	Peru	Cusco	Paucartambo	ACP Ukumari Llakta	chacra campamento Japumayo	-13.4487	-71.0118	ALE534-35
1016.15					Undetermined	0	0	0	Plate 76	Psychrophrynella sp. Japumayo	male	2015-06-21	20:53:00	2808	Peru	Cusco	Paucartambo	ACP Ukumari Llakta	chacra campamento Japumayo	-13.4487	-71.0118	ALE536-37
1017.15					Undetermined	0	0	0	Plate 76	Psychrophrynella sp. Japumayo	male	2015-06-21	20:20:00	2808	Peru	Cusco	Paucartambo	ACP Ukumari Llakta	chacra campamento Japumayo	-13.4487	-71.0118	ALE538-39
1018.15					Undetermined	0	0	0	Plate 76	Psychrophrynella sp. Japumayo	female	2015-06-21	20:16:00	2808	Peru	Cusco	Paucartambo	ACP Ukumari Llakta	chacra campamento Japumayo	-13.4487	-71.0118	ALE540-41
1019.15					Undetermined	0	0	0	Plate 76	Psychrophrynella sp. Japumayo	male	2015-06-21	20:45:00	2808	Peru	Cusco	Paucartambo	ACP Ukumari Llakta	chacra campamento Japumayo	-13.4487	-71.0118	ALE542-43
1021.15	97.15	CORBIDI	16500	Paratype	Undetermined	0	0	0	Plate 76	Psychrophrynella sp. Japumayo	female	2015-06-21	11:16:00	2718	Peru	Cusco	Paucartambo	ACP Ukumari Llakta	Derrumbe Japumayo	-13.4458	-71.0037	ALE563-65
1065.15										Psychrophrynella sp. Japumayo	male	2015-06-21	11:15:00	2711	Peru	Cusco	Paucartambo	ACP Ukumari Llakta	Derrumbe Japumayo	-13.4455	-71.0038	ALE554-55
1066.15										Psychrophrynella sp. Japumayo	male	2015-06-21	11:16:00	2718	Peru	Cusco	Paucartambo	ACP Ukumari Llakta	Derrumbe Japumayo	-13.4458	-71.0037	ALE556-57
1067.15										Psychrophrynella sp. Japumayo	male	2015-06-21	11:17:00	2718	Peru	Cusco	Paucartambo	ACP Ukumari Llakta	Derrumbe Japumayo	-13.4458	-71.0037	ALE558-59
1068.15	103.15	MHNC	14664	Paratype	Undetermined	0	0	0	Plate 68	Psychrophrynella sp. Japumayo	male	2015-06-21	11:18:00	2718	Peru	Cusco	Paucartambo	ACP Ukumari Llakta	Derrumbe Japumayo	-13.4458	-71.0037	ALE544-45
1069.15	108.15	MHNC	14666	Paratype	Undetermined	0	0	0	Plate 68	Psychrophrynella sp. Japumayo	male	2015-06-21	11:20:00	2718	Peru	Cusco	Paucartambo	ACP Ukumari Llakta	Derrumbe Japumayo	-13.4458	-71.0037	ALE886-95
1070.15	117.15	CORBIDI	16499	Paratype	Undetermined	0	0	0	Plate 68	Psychrophrynella sp. Japumayo	female	2015-06-21	11:23:00	2736	Peru	Cusco	Paucartambo	ACP Ukumari Llakta	Derrumbe Japumayo	-13.4458	-71.0036	ALE907-928
1072.15					Undetermined	0	0	0	Plate 68	Psychrophrynella sp. Japumayo	male	2015-06-21	11:30:00	2746	Peru	Cusco	Paucartambo	ACP Ukumari Llakta	Derrumbe Japumayo	-13.4458	-71.0035	ALE561-62
1073.15					Undetermined	0	0	0	Plate 68	Psychrophrynella sp. Japumayo	male	2015-06-21	11:36:00	2746	Peru	Cusco	Paucartambo	ACP Ukumari Llakta	Derrumbe Japumayo	-13.4458	-71.0035	ALE573-74
1074.15					Undetermined	0	0	0	Plate 68	Psychrophrynella sp. Japumayo	male	2015-06-21	11:53:00	2750	Peru	Cusco	Paucartambo	ACP Ukumari Llakta	Derrumbe Japumayo	-13.4459	-71.0035	ALE575-77

## Sheet: morphometric data
MALES
	PARATYPE	PARATYPE	PARATYPE	PARATYPE	PARATYPE	PARATYPE	HOLOTYPE	PARATYPE	PARATYPE	PARATYPE	PARATYPE	PARATYPE	PARATYPE	PARATYPE	PARATYPE	PARATYPE	PARATYPE
Measurement	92.15	100.15	88.15	107.15	111.15	99.15	127.15	91.15	104.15	120.15	108.15	121.15	93.15	103.15	90.15	87.15	89.15		count	min	max	average	sd
SVL	21.4	20.4	21.2	20.1	20	20.5	18.8	17.6	19.4	18.3	18.2	21.7	17	19.7	18	19.7	16.1		17	16.1	21.7	19.3	1.5902
Tibia Length	9.3	9.4	10.1	8.8	9.2	10	8.8	8.5	8.7	8.4	8.5	9.6	8.8	8.8	9.1	8.8	8		17	8	10.1	8.98824	0.560003
Foot length	10	10.4	10.2	9.9	9.8	9.9	8.7	9.3	9.1	7.1	8.7	10	9.2	9.2	9.4	9	8		17	7.1	10.4	9.28824	0.843269
Head length	8.1	8	7.8	7.4	7.3	7.7	7.5	6.8	7.2	6.9	6.9	7.4	6.7	7.2	7	7.7	6.3		17	6.3	8.1	7.28824	0.487189
Head width	7.8	7.4	7.1	6.9	7	7	6.8	6	6.8	6.6	6.8	7.9	6	6.8	6.4	7.4	5.6		17	5.6	7.9	6.84118	0.612432
Interorbital	2.3	2.3	2.3	2.3	2.4	2.3	2.2	2	1.8	1.8	2.1	2.4	1.9	2.1	2	2.3	1.9		17	1.8	2.4	2.14118	0.206334
Upper eyelidW	1.5	1.5	1.7	1.6	1.4	1.6	1.3	1.3	1.2	1.3	1.4	1.8	1.2	1.4	1.4	1.7	1.2		17	1.2	1.8	1.44118	0.187279
Internarial	2	2	2.1	1.9	2	2	1.8	1.8	2	2	2	2.2	1.8	2.1	2	2.1	1.8		17	1.8	2.2	1.97647	0.120049
Eye to nostril	1.8	1.7	1.8	1.8	1.7	2	1.8	1.7	1.7	1.7	1.7	1.9	1.6	1.7	1.6	1.8	1.5		17	1.5	2	1.73529	0.116946
Snout to eye	3.2	2.9	3.4	3.1	3.1	3.2	3	2.8	2.9	2.9	2.9	3.3	2.8	3	2.9	3.2	2.5		17	2.5	3.4	3.00588	0.21929
Nostril to snout	1.5	1.3	1.5	1.3	1.3	1.4	1.3	1.1	1.2	1.2	1.2	1.4	1.2	1.3	1.3	1.4	1		17	1	1.5	1.28824	0.131731
Eye diameter	2.3	2.5	2.3	2.3	2.4	2.5	2	2	2.1	2.1	2.1	2.5	2.1	2	2.2	2.3	2.1		17	2	2.5	2.22353	0.178639
Tympanum	1.2	1.3	1.2	1.2	1.3	1.2	1.3	1.1	1	0.9	1	1.2	0.9	1	1.1	1.2	1		17	0.9	1.3	1.12353	0.134766
Eye to tympanum	0.7	0.6	0.9	0.8	1	0.9	0.8	0.8	0.7	0.7	0.8	1	0.7	0.9	0.8	0.9	0.7		17	0.6	1	0.805882	0.114404
Forearm length	4.4	4.5	4.8	4.6	4.3	4.4	4	3.8	4.3	4.2	4	4.8	3.9	4.1	4.3	4.5	3.7		17	3.7	4.8	4.27059	0.323583
Hand length	5.2	5.1	5.4	5.1	4.8	5.2	4.6	4.6	5.1	4.8	4.4	5.1	4.8	4.9	4.8	4.9	4.5		17	4.4	5.4	4.9	0.276134
Finger I	2.6	2.6	2.6	2.4	2.4	3.1	2.3	2.7	2.6	2.6	2.5	2.7	2.3	2.7	2.5	2.4	2.1		17	2.1	3.1	2.53529	0.220627
Finger II	2.7	2.8	2.8	2.8	2.8	3.6	3.3	3.1	3.5	3.2	3.2	3.5	3.2	3.5	3.2	3.3	3.1		17	2.7	3.6	3.15294	0.287484
Thigh length	9.6	9.6	9.9	9.2	9.2	9.2	8	7.8	8	8.4	8.5	9.4	8.7	8.7	8.7	9.2	8		17	7.8	9.9	8.82941	0.645915
Tarsal length	5.2	5.4	5.3	5.3	5.3	5.4	5	4.5	5.3	5	5	5.8	5	5.3	5.1	5.2	4.5		17	4.5	5.8	5.15294	0.31646
TL/SVL	0.434579	0.460784	0.476415	0.437811	0.46	0.487805	0.468085	0.482955	0.448454	0.459016	0.467033	0.442396	0.517647	0.446701	0.505556	0.446701	0.496894		17	0.434579	0.517647
FL/SVL	0.46729	0.509804	0.481132	0.492537	0.49	0.482927	0.462766	0.528409	0.469072	0.387978	0.478022	0.460829	0.541176	0.467005	0.522222	0.456853	0.496894		17	0.387978	0.541176
HL/SVL	0.378505	0.392157	0.367925	0.368159	0.365	0.37561	0.398936	0.386364	0.371134	0.377049	0.379121	0.341014	0.394118	0.365482	0.388889	0.390863	0.391304		17	0.341014	0.398936
HW/SVL	0.364486	0.362745	0.334906	0.343284	0.35	0.341463	0.361702	0.340909	0.350515	0.360656	0.373626	0.364055	0.352941	0.345178	0.355556	0.375635	0.347826		17	0.334906	0.375635
HW/HL	0.962963	0.925	0.910256	0.932432	0.958904	0.909091	0.906667	0.882353	0.944444	0.956522	0.985507	1.06757	0.895522	0.944444	0.914286	0.961039	0.888889		17	0.882353	1.06757
E-N/ED	0.782609	0.68	0.782609	0.782609	0.708333	0.8	0.9	0.85	0.809524	0.809524	0.809524	0.76	0.761905	0.85	0.727273	0.782609	0.714286		17	0.68	0.9
EW/IOD	0.652174	0.652174	0.73913	0.695652	0.583333	0.695652	0.590909	0.65	0.666667	0.722222	0.666667	0.75	0.631579	0.666667	0.7	0.73913	0.631579		17	0.583333	0.75
FEMALES
	PARATYPE	PARATYPE	PARATYPE	PARATYPE	PARATYPE	PARATYPE	PARATYPE	PARATYPE	PARATYPE	PARATYPE
Measurement	119.15	110.15	106.15	102.15	105.15	118.15	117.15	86.15	128.15	97.15		count	min	max	average	sd
SVL	25.5	25.8	25	25.5	25.2	24.7	25.5	24.3	23.9	24.6		10	23.9	25.8	25	0.612826
Tibia Length	10.7	11	10.5	10.9	10.9	10.9	10.9	10.8	10.2	10.7		10	10.2	11	10.75	0.241523
Foot length	11.3	11.3	11	11.4	11.5	11.1	11	11	10.3	10.4		10	10.3	11.5	11.03	0.400139
Head length	9.1	9.7	9.2	9.2	9.3	8.7	8.9	8.7	8.6	8.8		10	8.6	9.7	9.02	0.34254
Head width	8.5	8.9	8.9	9	8.7	8.2	8.1	8.2	8	8.5		10	8	9	8.5	0.365148
Interorbital	2.8	2.8	2.7	2.7	2.7	2.6	2.8	2.5	2.5	2.7		10	2.5	2.8	2.68	0.113529
Upper eyelidW	1.8	2	1.9	1.9	1.9	1.7	1.8	1.7	1.6	1.8		10	1.6	2	1.81	0.119722
Internarial	2.7	2.7	2.5	2.6	2.6	2.3	2.6	2.4	2.4	2.5		10	2.3	2.7	2.53	0.133749
Eye to nostril	2	2	2.1	2.1	2.3	2	2.2	2	2	2.2		10	2	2.3	2.09	0.11005
Snout to eye	4	3.9	3.9	3.8	4	3.6	3.8	3.8	3.8	3.9		10	3.6	4	3.85	0.117851
Nostril to snout	1.7	1.8	1.7	1.8	1.8	1.5	1.8	1.4	1.4	1.7		10	1.4	1.8	1.66	0.164655
Eye diameter	2.7	2.8	2.6	2.8	2.8	2.7	2.6	2.6	2.5	2.7		10	2.5	2.8	2.68	0.10328
Tympanum	1.4	1.4	1.6	1.8	1.7	1.3	1.5	1.3	1.3	1.6		10	1.3	1.8	1.49	0.179196
Eye to tympanum	1	1	1	1.1	1.1	0.9	1	1	1	1		10	0.9	1.1	1.01	0.0567646
Forearm length	4.9	5	5.3	5.2	5.2	4.9	5.2	4.8	4.8	5.2		10	4.8	5.3	5.05	0.190029
Hand length	5.7	6.5	5.8	6.2	5.9	6.1	6.2	6	5.8	5.9		10	5.7	6.5	6.01	0.242441
Finger I	3.1	3.3	3.1	3.3	3.3	2.9	3.3	3.3	3.3	3.1		10	2.9	3.3	3.2	0.141421
Finger II	4	4.4	4.1	4.4	4.2	3.9	4.3	3.8	3.9	4.1		10	3.8	4.4	4.11	0.213177
Thigh length	11.1	11.3	11.1	11	11.1	10.8	10.8	10.6	10.4	11		10	10.4	11.3	10.92	0.269979
Tarsal length	6.2	6.4	6.2	6.5	6.5	6.2	5.9	6.2	5.8	6.2		10	5.8	6.5	6.21	0.228279
TL/SVL	0.419608	0.426357	0.42	0.427451	0.43254	0.441296	0.427451	0.444444	0.426778	0.434959		10	0.419608	0.444444
FL/SVL	0.443137	0.437984	0.44	0.447059	0.456349	0.449393	0.431373	0.452675	0.430962	0.422764		10	0.422764	0.456349
HL/SVL	0.356863	0.375969	0.368	0.360784	0.369048	0.352227	0.34902	0.358025	0.359833	0.357724		10	0.34902	0.375969
HW/SVL	0.333333	0.344961	0.356	0.352941	0.345238	0.331984	0.317647	0.337449	0.334728	0.345528		10	0.317647	0.356
HW/HL	0.934066	0.917526	0.967391	0.978261	0.935484	0.942529	0.910112	0.942529	0.930233	0.965909		10	0.910112	0.978261
E-N/ED	0.740741	0.714286	0.807692	0.75	0.821429	0.740741	0.846154	0.769231	0.8	0.814815		10	0.714286	0.846154
EW/IOD	0.642857	0.714286	0.703704	0.703704	0.703704	0.653846	0.642857	0.68	0.64	0.666667		10	0.64	0.714286

## Sheet: PCA
Species	SVL	TL	FL	HL	HW		PC1	PC2	PC3	PC4	PC5
chirihampatu	21.4	9.3	10	8.1	7.8		3.40551	-0.0639462	0.539579	0.404352	0.0480847			PCA (Correlation matrix)
chirihampatu	20.4	9.4	10.4	8	7.4		3.05335	0.875242	0.282124	0.514626	0.38354
chirihampatu	21.2	10.1	10.2	7.8	7.1		3.40461	1.44963	0.204675	-0.67084	-0.184921
chirihampatu	20.1	8.8	9.9	7.4	6.9		1.40101	0.774865	0.0562264	0.692709	-0.31456			Component loadings:
chirihampatu	20	9.2	9.8	7.3	7		1.61601	0.849351	-0.0834643	0.0177318	-0.128683			Comp.1 Comp.2 Comp.3 Comp.4 Comp.5
chirihampatu	20.5	10	9.9	7.7	7		2.78533	1.41959	0.333408	-0.791371	0.00612422			FL	0.436739	0.454483	-0.543461	0.534848	0.145916
chirihampatu	18.8	8.8	8.7	7.5	6.8		0.312847	0.394275	1.09769	-0.084577	0.146504			HL	0.452708	0.0870691	0.800641	0.307868	0.227302
chirihampatu	17.6	8.5	9.3	6.8	6		-1.03766	1.63663	0.0613951	0.412676	-0.00851386			HW	0.391736	-0.772238	-0.247643	-0.0335156	0.433291
chirihampatu	19.4	8.7	9.1	7.2	6.8		0.41879	0.43379	0.399837	0.170492	-0.257977			SVL	0.49097	-0.219269	-0.0146377	0.00052418	-0.843003
chirihampatu	18.3	8.4	7.1	6.9	6.6		-1.67726	-0.578592	1.51416	-0.962409	-0.377125			TL	0.458045	0.376077	-0.0456466	-0.786149	0.169253
chirihampatu	18.2	8.5	8.7	6.9	6.8		-0.591158	0.194116	0.293409	0.00433328	0.15427
chirihampatu	21.7	9.6	10	7.4	7.9		3.25549	-0.14399	-0.500656	-0.384892	-0.234985			Component variances:
chirihampatu	17	8.8	9.2	6.7	6		-1.12815	1.84489	-0.0248245	-0.120377	0.353963			Comp.1 Comp.2 Comp.3 Comp.4 Comp.5
chirihampatu	19.7	8.8	9.2	7.2	6.8		0.652132	0.515043	0.318247	0.103659	-0.375927			3.7102372 0.6552306 0.3276770 0.2026313 0.1042239
chirihampatu	18	9.1	9.4	7	6.4		0.0407366	1.55239	0.054236	-0.252218	0.32905
chirihampatu	19.7	8.8	9	7.7	7.4		1.31783	-0.289746	0.91031	0.19849	0.210886			Importance of components:
chirihampatu	16.1	8	8	6.3	5.6		-3.30995	1.18932	0.503536	-0.0555051	-0.0530774			Comp.1 Comp.2 Comp.3 Comp.4 Comp.5
usurpator	23.3	9.7	10.9	7.3	8.5		4.67162	-0.553873	-1.54426	0.0194057	-0.533722			Standard deviation	1.9262	0.809463	0.572431	0.450146	0.322837
usurpator	20.5	9.6	8.7	7.5	8		2.2716	-0.852183	0.529166	-1.24282	0.294138			Proportion of Variance	0.742047	0.131046	0.0655354	0.0405262	0.0208448
usurpator	17.2	8.2	7.8	6.2	6.9		-2.15036	-0.623115	-0.0497903	-0.592688	0.244635			Cumulative Proportion	0.742047	0.873094	0.938629	0.979155	1
usurpator	20.4	9	9	7.1	7.8		1.48926	-0.858704	-0.109049	-0.417126	-0.0701747
usurpator	18.5	8.6	9.2	6.5	7.4		-0.0581126	-0.310338	-0.871523	-0.0307335	0.382045
usurpator	19	8.2	8.5	7	7.2		-0.349007	-0.728536	0.42711	0.30646	-0.0910894
usurpator	18.3	7.7	7.8	6.6	7.1		-1.74984	-1.30201	0.453721	0.293355	-0.212039
usurpator	17.8	8.3	8.2	6.3	7.3		-1.31324	-0.90046	-0.370509	-0.419078	0.341813
usurpator	19.6	9	9.3	7	8.2		1.58063	-1.08887	-0.615538	-0.283942	0.676022
usurpator	15.1	7.8	7.9	5	5.8		-4.74165	0.693219	-1.28834	-0.55807	0.0532302
usurpator	16.1	7.8	7.8	5.5	6		-3.95382	0.311372	-0.61377	-0.371199	-0.180507
usurpator	17.7	7.8	8.1	6.6	6.9		-1.82226	-0.718585	0.320708	0.376533	0.0645732
usurpator	17.1	7.9	8.6	6	6.4		-2.44569	0.273523	-0.665521	0.294906	-0.0713126
usurpator	20.2	8.3	9.1	6.5	7.3		0.13088	-0.683741	-0.752603	0.315472	-0.739125
usurpator	17.2	7.8	8.2	6.3	6.2		-2.61357	0.256361	0.122908	0.324273	-0.256325
usurpator	16.4	7.8	7.8	5.9	6.2		-3.41376	0.0745597	-0.142209	-0.168359	-0.046531
usurpator	18.5	8.1	7.9	6.8	7.4		-0.959624	-1.36108	0.505075	-0.0929249	0.106361
usurpator	19.3	8.5	8.3	6.2	7.5		-0.562505	-1.19606	-0.692012	-0.686546	-0.309104
usurpator	18.3	8.1	8.4	6.6	8.1		-0.446053	-1.95553	-0.409886	0.10979	0.73216
usurpator	20.1	9	9.9	7.2	7.4		1.72513	0.240327	-0.441217	0.285099	0.021625
usurpator	19	9.1	9.6	6.9	6.9		0.720975	0.876422	-0.43954	-0.193574	0.129356
usurpator	19.2	8.7	9.1	6.7	6.9		0.0257151	0.260071	-0.333841	-0.102288	-0.273091
usurpator	18	8.4	9	6.7	7.1		-0.528606	-0.0760464	-0.309176	0.226382	0.427633
usurpator	19.8	9.1	9.7	6.9	7.3		1.29391	0.312226	-0.680918	-0.145696	-0.0102366
usurpator	19.1	8.8	9.7	6.7	6.9		0.414239	0.694937	-0.765433	0.178987	-0.0742237
usurpator	18.2	7.9	8.5	6.6	6.6		-1.54698	-0.107634	0.147059	0.535252	-0.321048
usurpator	19.5	8.9	9.8	7.4	7.5		1.61648	0.105573	-0.119513	0.453197	0.4561
usurpator	18.9	8.6	8.7	6.9	7		-0.156661	-0.0955046	0.197286	-0.143034	-0.0619783
usurpator	18.9	8.6	9.7	7	7.1		0.555075	0.384449	-0.412171	0.601385	0.238748
usurpator	20.1	8.5	8.7	7.1	7.4		0.566163	-0.81169	0.308709	0.0787975	-0.392878
usurpator	19.7	8.5	8.9	7.3	7.3		0.643465	-0.478404	0.489696	0.330349	-0.125411
usurpator	19.9	9.1	8.8	6.6	7.1		0.449754	-0.0261958	-0.38042	-0.9218	-0.497581
usurpator	19.5	9.2	8.4	7.5	7		0.815467	0.123122	1.19009	-0.850649	-0.0385309
usurpator	18	7.8	8.1	6.7	6.2		-2.09775	0.142244	0.741878	0.468659	-0.561126
usurpator	18.5	8.2	9	7.1	7.3		-0.0831171	-0.472385	0.176321	0.702462	0.391893
usurpator	18.7	8.5	8.7	7.4	7.6		0.478609	-0.818418	0.657663	0.227611	0.644337
usurpator	16.4	7.6	7.8	6.1	6.1		-3.48018	0.101106	0.19233	0.217203	-0.0976892
usurpator	20	8.7	9.6	7.6	7.3		1.53337	0.0686319	0.392479	0.705146	0.0184193
usurpator	21.5	8.4	9.1	7.2	8		1.63134	-1.5891	-0.0853044	0.514832	-0.655619
usurpator	18.2	8.5	9	6.7	6.9		-0.513279	0.214442	-0.237581	0.100889	0.203621
usurpator	18.4	8.3	9.1	6.8	6.9		-0.472394	0.129214	-0.15544	0.497218	0.0923605
usurpator	17.5	8.5	8.8	6.5	6.8		-1.07468	0.29381	-0.326524	-0.140019	0.4
